# Supplementary material
Source: PubMed Central journal article supplement (PMC5563924)
Supplement: Supp_Fig1.pdf [file Supp_Fig1.pdf]

## Supplementary Data

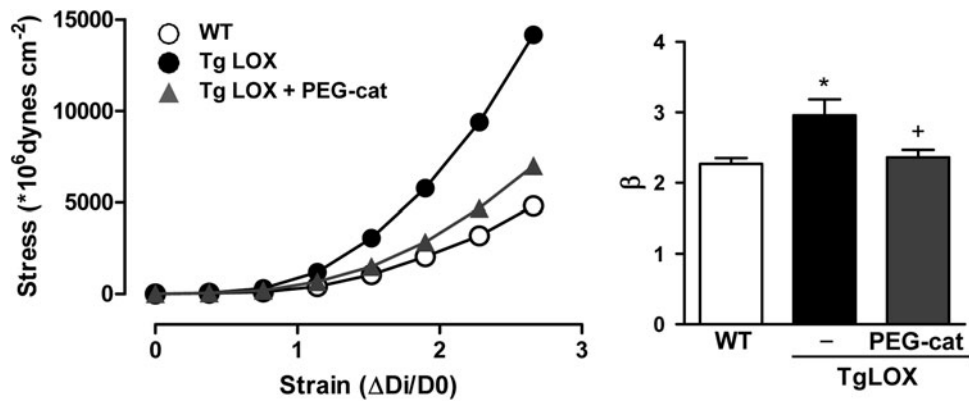

**SUPPLEMENTARY FIG. S1. LOX transgenesis enhances aortic stiffness by an  $\text{H}_2\text{O}_2$ -dependent mechanism.** Stress-strain curves of aortic segments from WT, TgLOX, or TgLOX mice treated with PEG-catalase (PEG-cat) in a single experiment (*left panel*). *Right panel* shows aortic stiffness calculated from  $\beta$ -values from all the animals (slopes of the stress-strain relationships). Results are represented as mean  $\pm$  SEM ( $n=6-7$ ;  $*p < 0.05$  vs. WT;  $+p < 0.05$  vs. untreated TgLOX mice). SEM, standard error of the mean; PEG-catalase, polyethylene glycol-conjugated catalase.
