# Supplementary material
Source: PubMed Central journal article supplement (PMC5563924)
Supplement: Supp_Fig2.pdf [file Supp_Fig2.pdf]

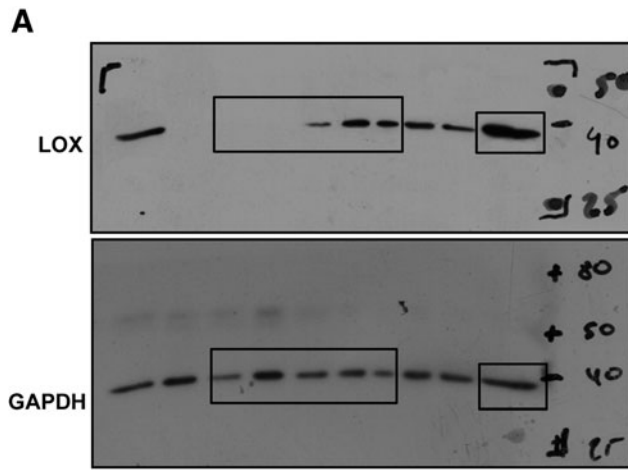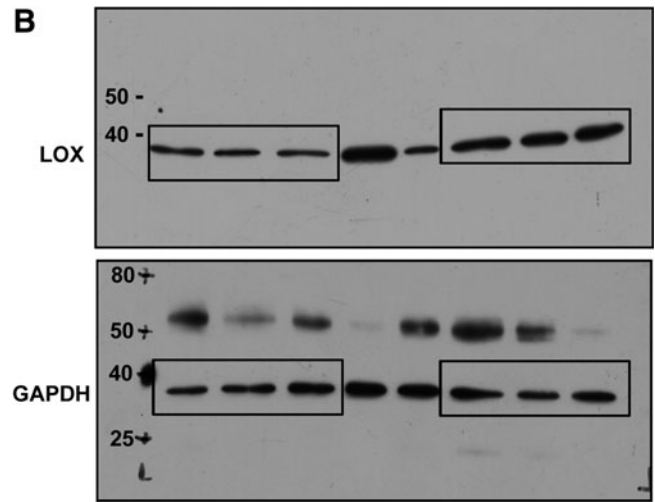

**SUPPLEMENTARY FIG. S2.** Original uncropped images of *blots* shown in Figure 2A (**A**) and Figure 2B (**B**). Bands in *squares* correspond to those shown in Figure 2.
