# Supplementary material
Source: PubMed Central journal article supplement (PMC5563924)
Supplement: Supp_Fig3.pdf [file Supp_Fig3.pdf]

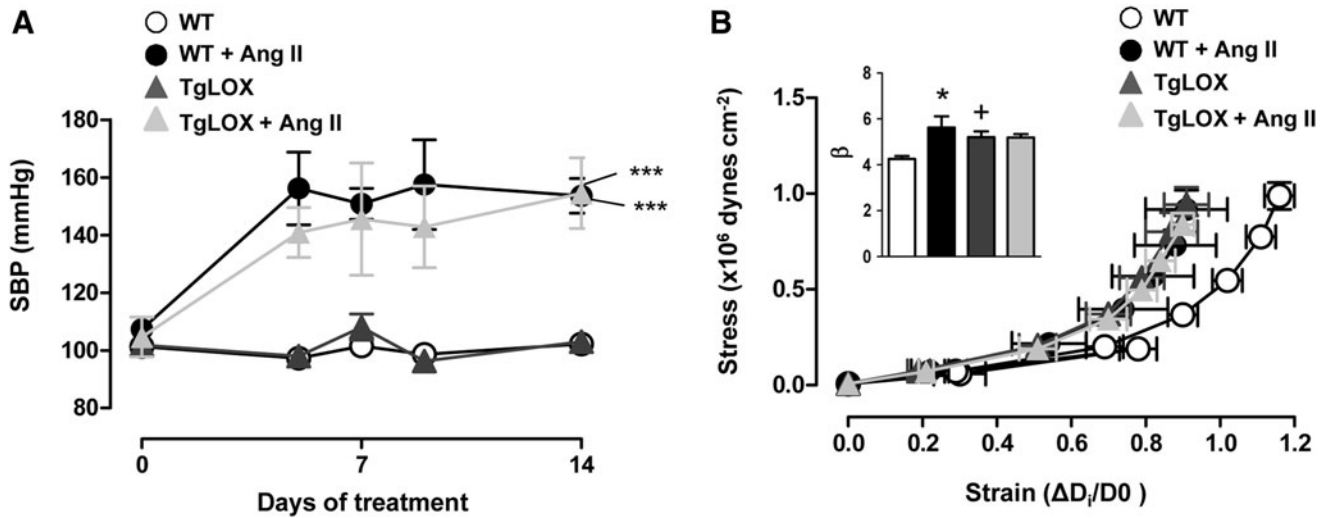

**SUPPLEMENTARY FIG. S3. LOX overexpression does not affect AngII-induced hypertension or vascular stiffness.** Effect of Ang II on blood pressure (A) and stress-strain curves (B) in MRAs from WT and TgLOX mice. Results are represented as mean  $\pm$  SEM ( $n=8-10$ ; \* $p < 0.05$ , \*\*\* $p < 0.001$  vs. untreated mice; + $p < 0.05$  vs. WT). LOX, lysyl oxidase; MRA, mesenteric resistance arteries.
