# Supplementary material
Source: PubMed Central journal article supplement (PMC5563924)
Supplement: Supp_Fig4.pdf [file Supp_Fig4.pdf]

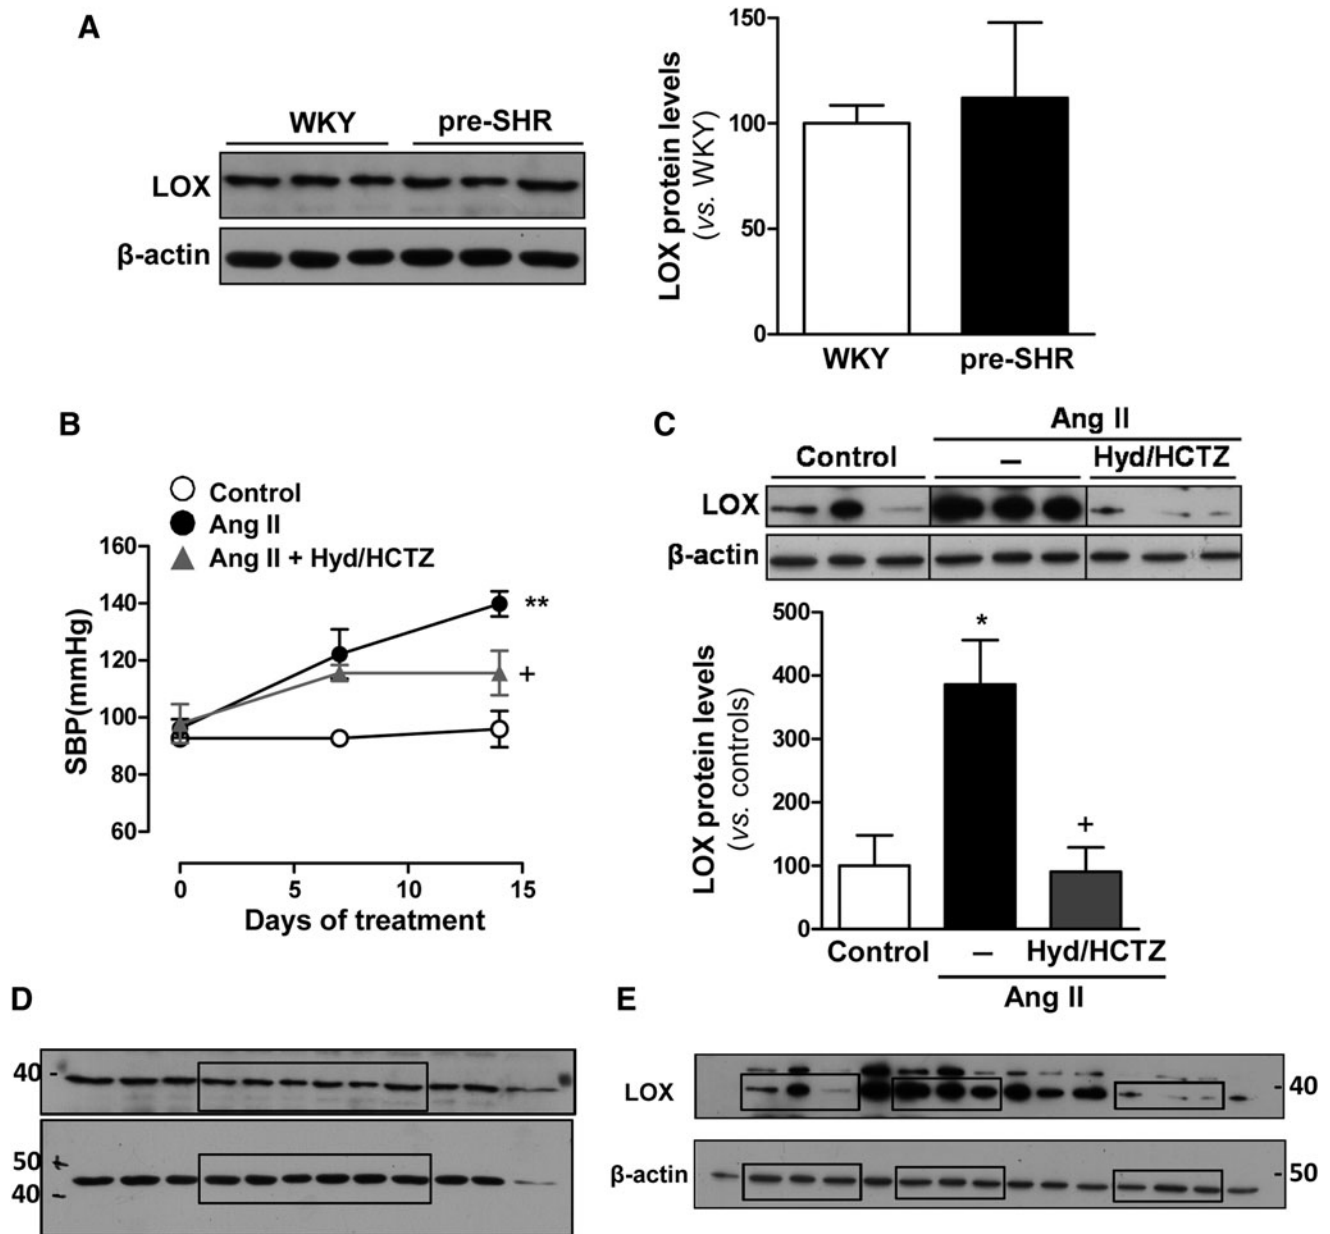

**SUPPLEMENTARY FIG. S4. Impact of blood pressure on vascular LOX expression.** Vascular LOX protein expression in aorta from pre-hypertensive SHR (pre-SHR) and age-matched WKY rats (A). (B, C) Effect of the combination of hydralazine (Hyd) plus hydrochlorothiazide (HCTZ) on blood pressure (B) and vascular protein levels of LOX (C) in Ang II-infused mice. Results are shown as mean  $\pm$  SEM ( $n = 6-8$ ; \* $p < 0.05$ , \*\* $p < 0.01$  vs. control animals; + $p < 0.05$  vs. Ang II-infused mice). (D, E) Original uncropped images of blots shown in (A, B), respectively. Ang II, angiotensin II; SHR, spontaneously hypertensive rats; WKY, Wistar Kyoto.
