# Supplementary material
Source: PubMed Central journal article supplement (PMC5563924)
Supplement: Supp_Fig5.pdf [file Supp_Fig5.pdf]

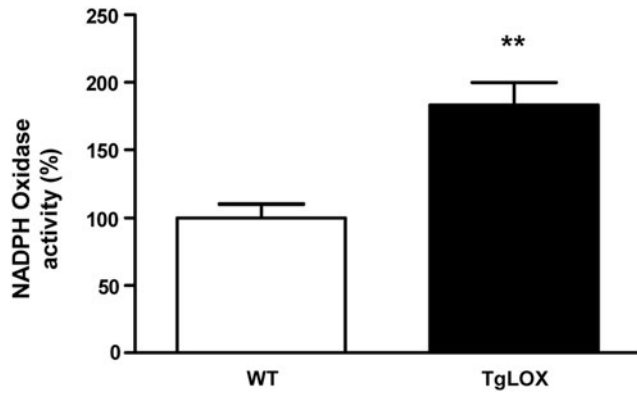

**SUPPLEMENTARY FIG. S5. NADPH oxidase activity is induced in vascular smooth muscle cells (VSMC) from LOX transgenic mice.** NADPH oxidase activity in VSMC isolated from WT or TgLOX mice. Results are shown as mean  $\pm$  SEM ( $n=7$ ; \*\* $p<0.01$  vs. WT).
