# Supplementary material
Source: PubMed Central journal article supplement (PMC5563924)
Supplement: Supp_Fig6.pdf [file Supp_Fig6.pdf]

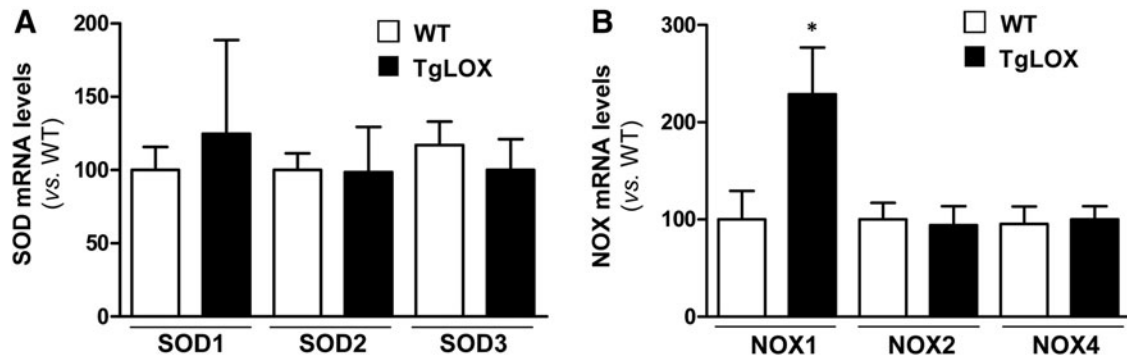

**SUPPLEMENTARY FIG. S6. Effect of LOX transgenesis on the vascular expression of SOD or NOX enzymes.** Vascular mRNA levels of SOD (A) and NOX (B) enzymes in aorta from WT or TgLOX mice. Results are shown as mean  $\pm$  SEM ( $n=6-7$ ; \* $p < 0.05$  vs. WT). NOX, NADPH oxidase isoforms; SOD, superoxide dismutase.
