# Supplementary material
Source: PubMed Central journal article supplement (PMC5563924)
Supplement: Supp_Fig7.pdf [file Supp_Fig7.pdf]

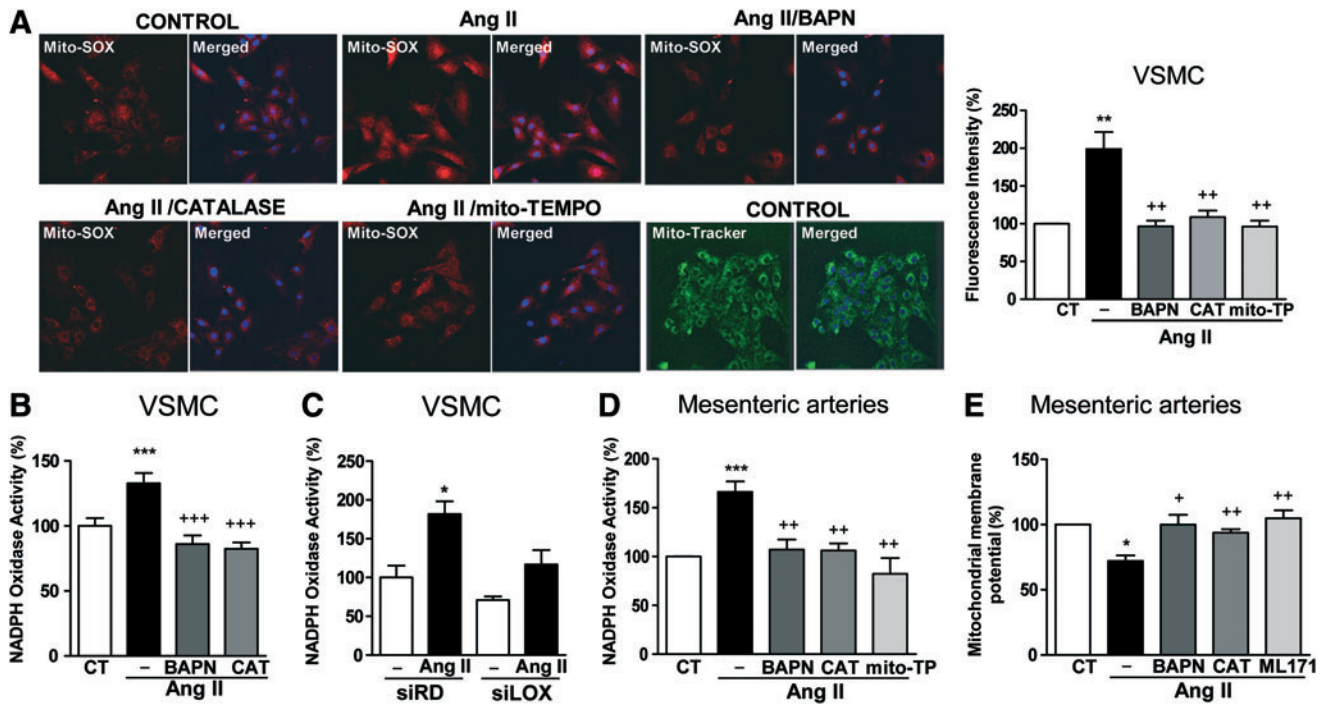

**SUPPLEMENTARY FIG. S7. Ang II-stimulated ROS production is prevented by LOX inhibition and by antioxidants.** Mitochondrial ROS production (A) and NADPH oxidase activity (B, C) in VSMC stimulated with Ang II and pretreated or not (Control, CT) with BAPN, catalase (CAT), or mito-TEMPO (mito-TP) (A, B) or transfected with a specific siRNA (siLOX) or siRandom (siRD) (C). Mitochondrial ROS production was visualized by using the fluorescent probe MitoSOX. Mito-Tracker staining was used as a control of mitochondria location. Image size:  $375 \times 375 \mu\text{m}$ . NADPH oxidase activity (D) and mitochondrial membrane potential (E) of mesenteric arteries stimulated with Ang II and pretreated or not with BAPN, catalase, mito-TEMPO, or ML171. Data are represented as mean  $\pm$  SEM ( $n = 3-10$ ; \* $p < 0.05$ , \*\* $p < 0.01$ , \*\*\* $p < 0.001$  vs. controls or unstimulated cells; + $p < 0.05$ , ++ $p < 0.01$  vs. cells or mesenteric arteries treated with Ang II alone). BAPN,  $\beta$ -aminopropionitrile; ROS, reactive oxygen species.
