# Supplementary material
Source: PubMed Central journal article supplement (PMC5563924)
Supplement: Supp_Fig8.pdf [file Supp_Fig8.pdf]

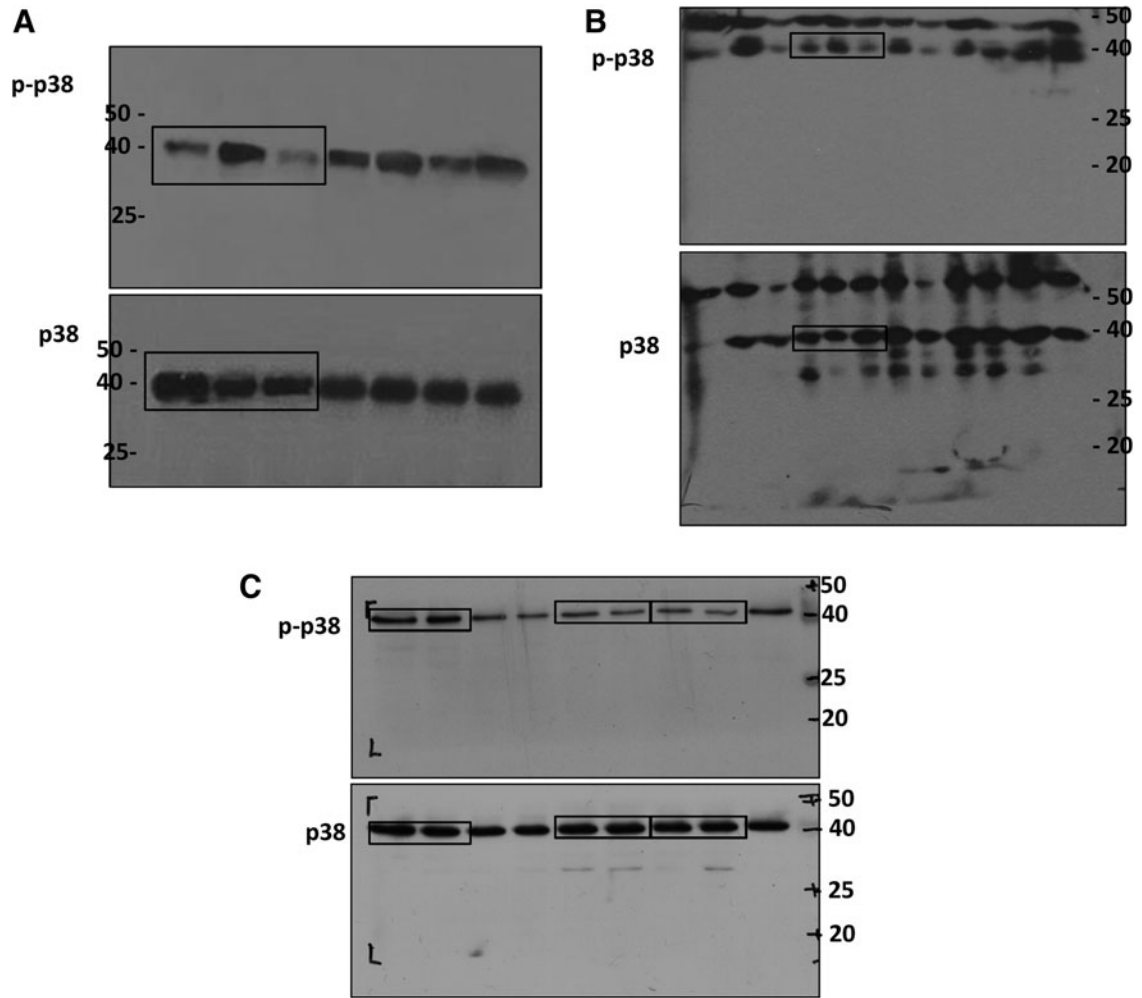

**SUPPLEMENTARY FIG. S8.** Original uncropped images of *blots* shown in Figure 7A (A), 7B (B), and 7C (C). Bands in *squares* correspond to those shown in Figure 7.
