# Supplementary material
Source: PubMed Central journal article supplement (PMC5563924)
Supplement: Supp_Fig9.pdf [file Supp_Fig9.pdf]

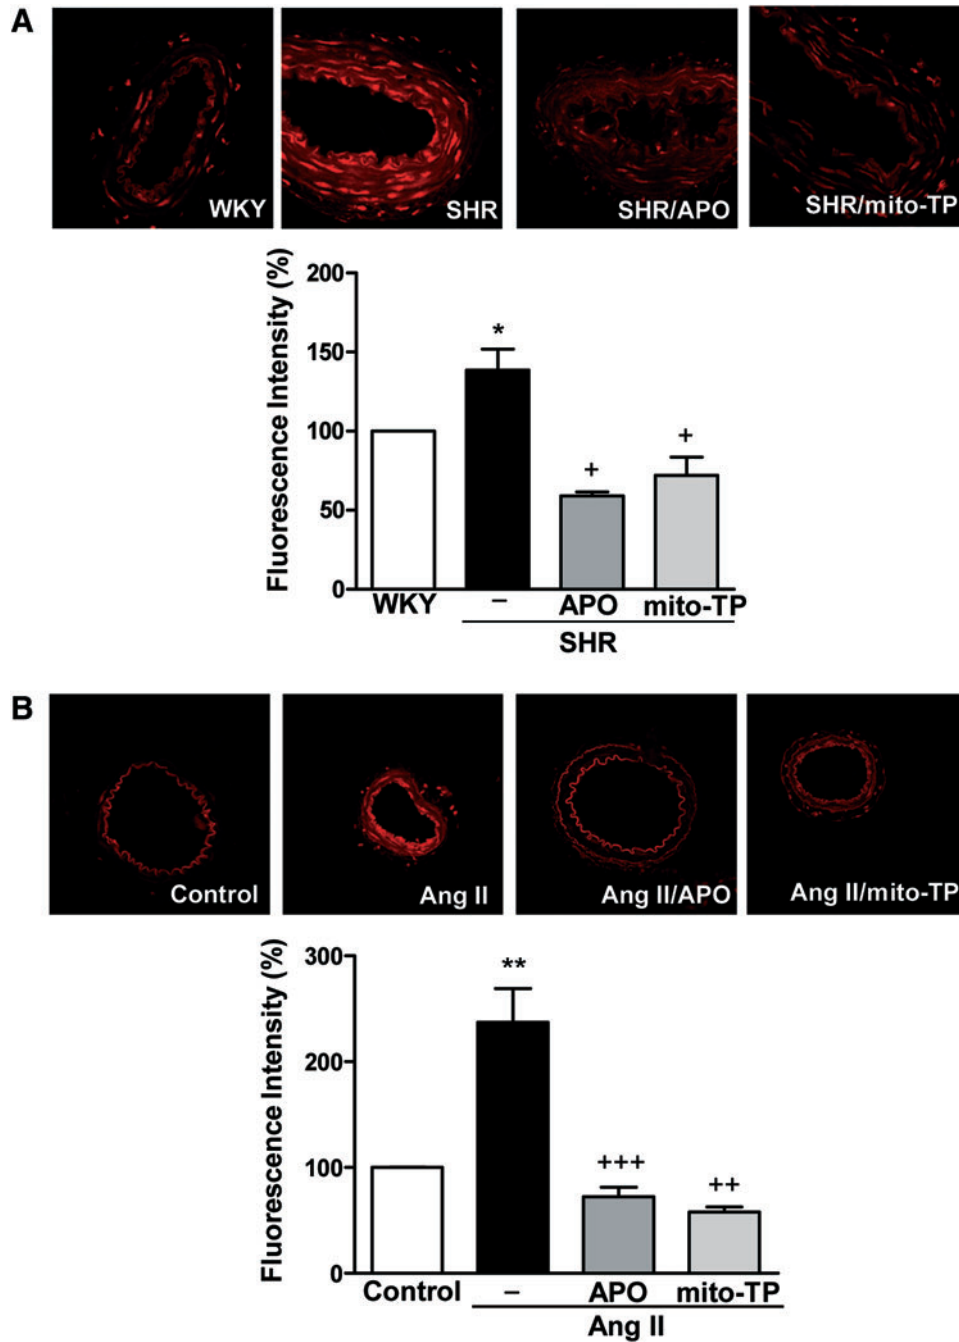

**SUPPLEMENTARY FIG. S9. Apocynin and mitoTEMPO reduce vascular oxidative stress in hypertension models.** Vascular superoxide anion production in arteries from WKY and SHR rats (A) or from control and Ang II-infused mice (B) treated with apocynin (APO) or mito-TEMPO (mito-TP). Representative images of dihydroethidium staining are shown. Image size  $238 \times 238 \mu\text{m}$ . Results are represented as mean  $\pm$  SEM ( $n=4-8$ ; \* $p < 0.05$ , \*\* $p < 0.01$  vs. WKY or control animals; + $p < 0.05$ , ++ $p < 0.01$ , +++ $p < 0.001$  vs. untreated SHR or Ang II-infused mice).
